# Supplementary material
Source: Royal Society of Chemistry journal article supplement (doi:10.1039/d6cy00414h)
Supplement: d6cy00414h1.pdf [file d6cy00414h1.pdf]

## Supporting Information

# Influence of Crystal Facets of SrTiO<sub>3</sub> Nanosheet Supports on Pd Catalysts for Automotive Exhaust Purification

*Toyokazu Tanabe<sup>a\*</sup>, Moe Hokugo<sup>a</sup>, Sei Imatoku<sup>a</sup>, Kentaro Toyama<sup>a</sup>, Takaaki Morimoto<sup>a</sup>, Reito Kobayashi<sup>b</sup>, Shugoro Tsutsumi<sup>b</sup>, Saburo Hosokawa<sup>b</sup>*

<sup>a</sup> Department of Materials Science and Engineering, National Defense Academy, 1-10-20, Hashirimizu, Yokosuka Kanagawa 239-0811, Japan

<sup>b</sup> Faculty of Materials Science and Engineering, Kyoto Institute of Technology, Matsugasaki, Sakyo-ku, Kyoto 606-8585, Japan.

### Corresponding Author

Toyokazu Tanabe\*

Department of Materials Science and Engineering, National Defense Academy, 1-10-20, Hashirimizu, Yokosuka Kanagawa 239-0811, Japan

TEL: +81-46-841-3810 (ext.3661)

FAX: +81-46-844-5910

E-mail: [tanabet@nda.ac.jp](mailto:tanabet@nda.ac.jp)

*CO pulse experiments:* CO pulse experiments were carried out using a flow-type reactor (MicrotracBEL BELCATII). The sample (5 mg) was pretreated at 773 K in a flow of 5% H<sub>2</sub>/Ar. Next, the reactor was purged with He gas, and CO (0.997 cm<sup>3</sup>, 1 vol% in He = 0.434 μmol-CO pulse<sup>-1</sup>) was injected into the reactor heated to 323 K. Pulse injections were separated by He purges. The outlet gas was analyzed using a thermal conductivity detector (TCD) gas chromatograph equipped with an MS-5A column.

**Table S1.** CO adsorption and Pd dispersion for Pd/SrTiO<sub>3</sub>(111) and Pd/SrTiO<sub>3</sub>(100).

| Sapmle      | CO adsorption<br>(cm <sup>3</sup> /g-cat) | Pd dispersion<br>(%) |
|-------------|-------------------------------------------|----------------------|
| Pd/STO(111) | 0.1753                                    | 8.3                  |
| Pd/STO(100) | 0.0055                                    | 0.3                  |

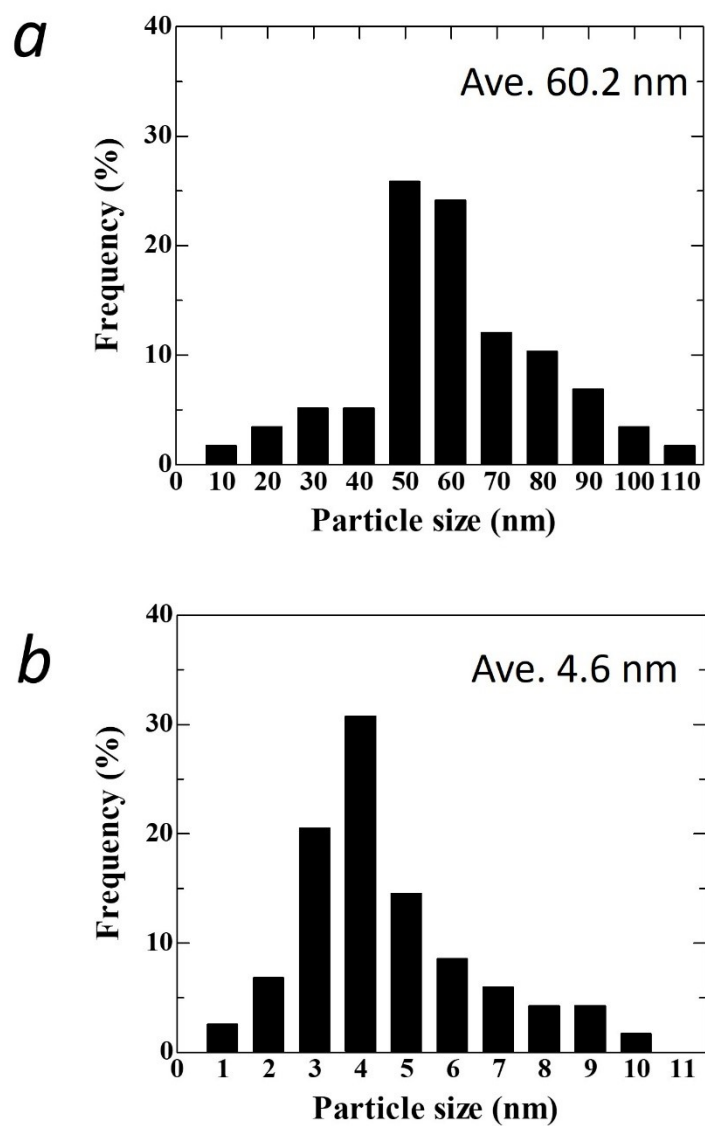

**Figure S1.** Histograms of the Pd particle size observed on Pd-loaded SrTiO<sub>3</sub>(100)-facet after the catalytic reaction (a) and on Pd-loaded SrTiO<sub>3</sub>(111)-facet after the catalytic reaction (b). The average Pd particle size for each sample is also indicated.

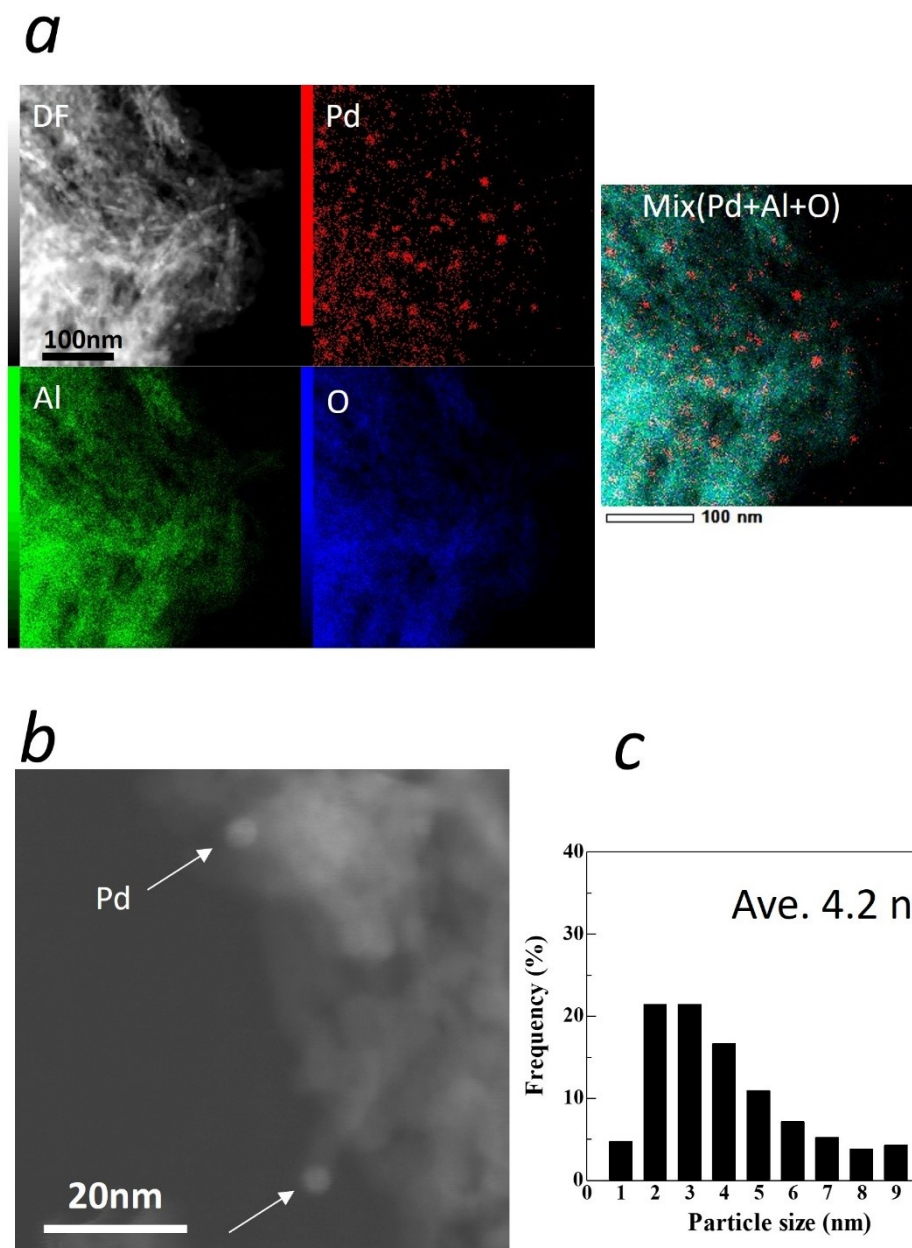

**Figure S2.** STEM-EDS elemental mapping of Pd/Al<sub>2</sub>O<sub>3</sub> (a): DF image (gray), Pd (red), Al (green) and O (blue). HAADF-STEM image highlighting the morphology and dispersion state of Pd nanoparticles on the Al<sub>2</sub>O<sub>3</sub> surface (b). Histograms of the Pd particle size observed on Pd/Al<sub>2</sub>O<sub>3</sub> (c). The average Pd particle size is also indicated.

**Top view** Lattice coherence between PdO(100) and SrTiO<sub>3</sub>(111)

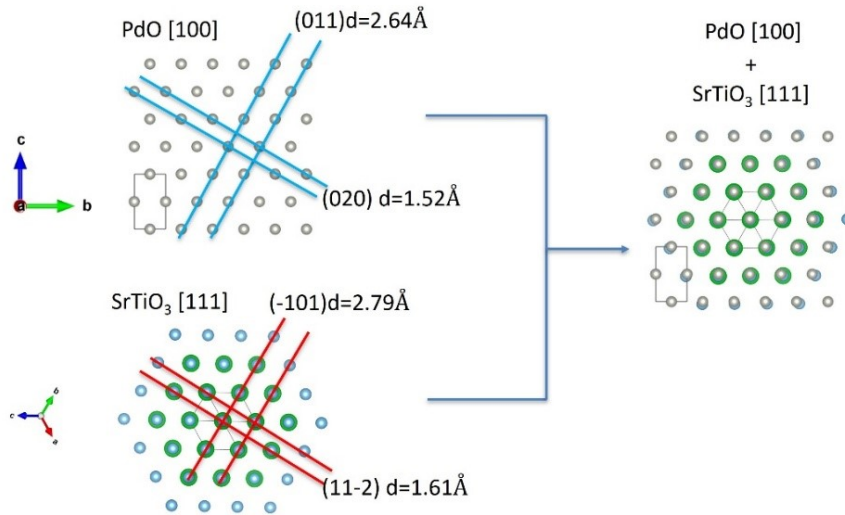

**Side view** Lattice coherence between PdO(100) and SrTiO<sub>3</sub>(111)

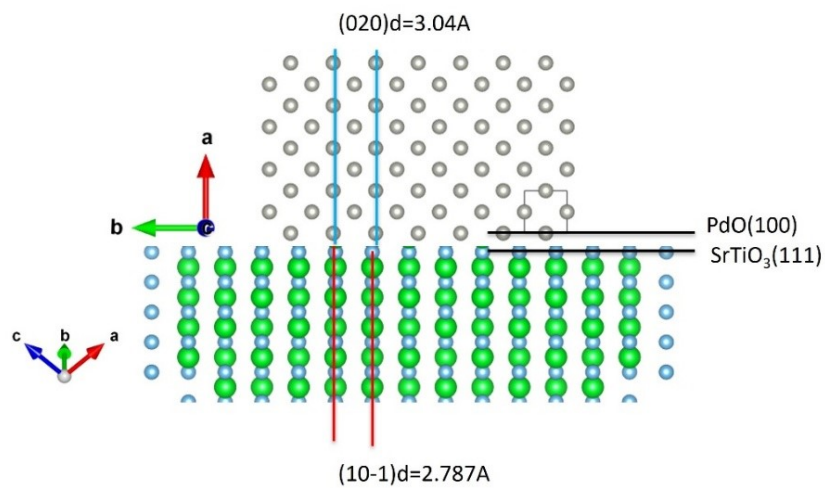

**Figure S3.** Possible atomic arrangement of PdO(100)-SrTiO<sub>3</sub>(111) interface: Pd (gray), Sr (green), blue (Ti).
